# Supplementary material for: Genetic and evolutionary analysis of a new Asia-4 lineage and naturally recombinant canine distemper virus strains from Thailand
Source: PubMed Central journal article supplement (PMC6397162; doi:10.1038/s41598-019-39413-w), 2019-03-01
Supplement: 41598_2019_39413_MOESM1_ESM.pdf [file 41598_2019_39413_MOESM1_ESM.pdf]

**Genetic and evolutionary analysis of a new Asia-4 lineage and naturally recombinant canine distemper virus strains from Thailand**

Chutchai Piewbang, Araya Radtanakantikanon, Jiratchaya Puenpa, Yong Poovorawan, Somporn Techangamsuwan\*

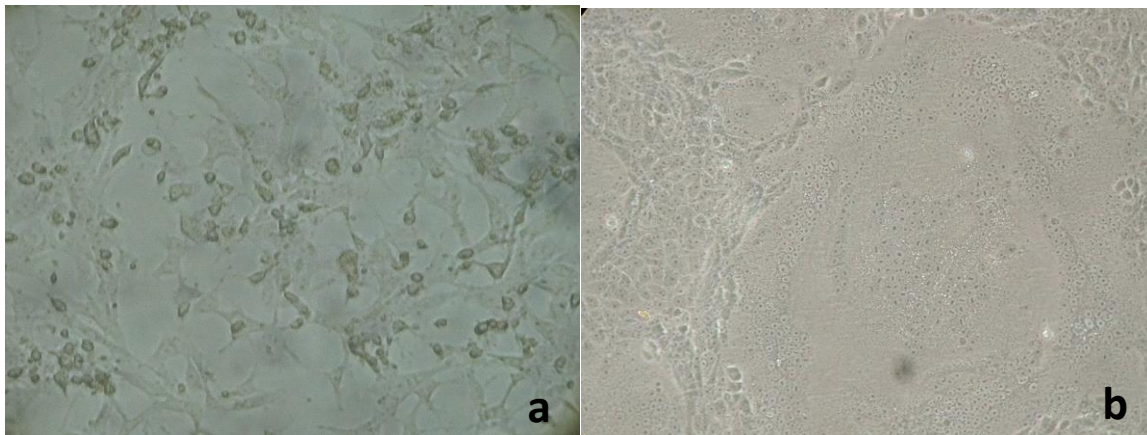

**Fig. S4. Cytopathic effect (CPE) after CDV Thai strain inoculation in Vero-DST cell line.** Stellate cell formation after 24 hours inoculation Vero-DST with CDV6 TH/2014 (a). and syncytial cell formation (b) after CDV2 TH/2014 inoculation.

**Table S1.** Sixteen CDV primer sets used for whole genome sequencing

| <b>Direction</b> | <b>Primer</b>                   | <b>Position</b> |
|------------------|---------------------------------|-----------------|
| <b>Forward</b>   | 5'-ATGGCTAGCCTTCTCAAGAGC-3'     | 1-21            |
| <b>Reverse</b>   | 5'-CAAATCATTTCAGCAATTCTAGGC-3'  | 764-741         |
| <b>Forward</b>   | 5'-GAATGAACAAAATATGGCTTGATAT-3' | 736-760         |
| <b>Reverse</b>   | 5'-GATTCTCTCTGAGGGCTTTGAG-3'    | 1867-1846       |
| <b>Forward</b>   | 5'-CTTAGGACCCAGGTCCAACAA-3'     | 1739-1759)      |
| <b>Reverse</b>   | 5'-GAATCAGTCTCTCCTTTAAGCAG-3'   | 2843-2821       |
| <b>Forward</b>   | 5'-GCAAAGATGACCCAGAAATGCAA-3'   | 2635-2657       |
| <b>Reverse</b>   | 5'-CCAGTTGTTCTTGACACCTG-3'      | 3765-3745       |
| <b>Forward</b>   | 5'-GGGAGAGATTCAGGAAGAGCA-3'     | 2995-3015       |
| <b>Reverse</b>   | 5'-GAGCGGGTAACACAGGATTTTC-3'    | 4283-4262       |
| <b>Forward</b>   | 5'-GGGATTAGTGTTTGCTCTAGGA-3'    | 4163-4184       |
| <b>Reverse</b>   | 5'-CTCACCTAATTCTGCTTTGGTAC-3'   | 5495-5473       |
| <b>Forward</b>   | 5'-GGTTAGTCCTATGGTGCATTGG-3'    | 5287-5308       |
| <b>Reverse</b>   | 5'-CCAGTGGGCAGGTATCGGAG-3'      | 6537-6518       |
| <b>Forward</b>   | 5'-CAGCCATTTGTAGCCAGAACTC-3'    | 6289-6310       |
| <b>Reverse</b>   | 5'-AGGTGGATTTATGCACCAATGG-3'    | 7507-7486       |
| <b>Forward</b>   | 5'-GAAAACCTTAGGGCTCAGGTAGT-3'   | 7051-7072       |
| <b>Reverse</b>   | 5'-AACCGCCCATAAGATGGCAAC-3'     | 8304-8284       |
| <b>Forward</b>   | 5'-GGTAAACTTATTTGCTAGTTCCT-3'   | 7763-7787       |
| <b>Reverse</b>   | 5'-GGGATAAGATAACAAGGTCTGATT-3'  | 9270-9246       |
| <b>Forward</b>   | 5'-GTCCATCTAGATAGCCCAATTG-3'    | 9069-9090       |
| <b>Reverse</b>   | 5'-CCATGTCTATCCCGATAACCG-3'     | 10243-10223     |

---

|                |                                 |             |
|----------------|---------------------------------|-------------|
| <b>Forward</b> | 5'-GAAATTCAGGAGATTTTACAGGAC-3'  | 9960-9983   |
| <b>Reverse</b> | 5'-GTTTCATTTGCTTTCAAATGATGTC-3' | 11497-11473 |
| <b>Forward</b> | 5'-CCCCTAACTCTCAAATATTCATC -3'  | 11203-11225 |
| <b>Reverse</b> | 5'-GTGGTTCCTTAATGCTCTCGC-3'     | 12458-12438 |
| <b>Forward</b> | 5'-GGATAGGAAAATTATTATCCCAAG-3'  | 12179-12202 |
| <b>Reverse</b> | 5'-TTTCAAAGCCCCAGTTGATTGC-3'    | 13524-13503 |
| <b>Forward</b> | 5'-CAGATTGTTGCGTAATACCCATG-3'   | 13129-13151 |
| <b>Reverse</b> | 5'-GTAAGGTGAAATCTCTCGTTGTC-3'   | 14511-14488 |
| <b>Forward</b> | 5'-GATTAGGAGTCCGGA ACTATGAG-3'  | 14257-14279 |
| <b>Reverse</b> | 5'-ACCAGACAAAGCTGGGTATGATA-3'   | 15690-15668 |

---

**Table S2.** Complete CDV sequences retrieving from GenBank used in genetic alignment for phylogenetic analysis.

| <b>Accession no.</b> | <b>Strain</b> | <b>Host</b> | <b>Country</b> | <b>Genotype<sup>a</sup></b> | <b>Year</b> |
|----------------------|---------------|-------------|----------------|-----------------------------|-------------|
| <b>AY443350</b>      | 00-2601       | Raccoon     | USA            | America-2                   | 2000        |
| <b>AY649446</b>      | 01-2689       | Raccoon     | USA            | America-2                   | 2001        |
| <b>KJ123771</b>      | 171391-513    | Dog         | USA            | America-2                   | 2004        |
| <b>AF164967</b>      | A75/17        | Dog         | USA            | America-2                   | N/A         |
| <b>KJ466106</b>      | CDV SY        | Raccoon     | China          | Asia-1                      | 2012        |
| <b>KC427278</b>      | Hebei         | Mink        | China          | Asia-1                      | 2008        |
| <b>HM852904</b>      | MKY-KM08      | Monkey      | China          | Asia-1                      | 2008        |
| <b>JN896331</b>      | PS            | Dog         | China          | Asia-1                      | 2010        |
| <b>JX681125</b>      | HLJ1-06       | Fox         | China          | Asia-1                      | 2006        |
| <b>AB474397</b>      | 007LM         | Dog         | Japan          | Asia-2                      | N/A         |
| <b>AB476401</b>      | 011C          | Dog         | Japan          | Asia-2                      | N/A         |
| <b>AB476402</b>      | 50Con         | Dog         | Japan          | Asia-2                      | N/A         |
| <b>AB475097</b>      | M25CR         | Dog         | Japan          | Asia-2                      | N/A         |
| <b>AY445077</b>      | 98-2645       | Raccoon     | USA            | America-1                   | 1998        |
| <b>AY542312</b>      | 98-2646       | Raccoon     | USA            | America-1                   | 1998        |
| <b>AY446011</b>      | 98-2654       | Raccoon     | USA            | America-1                   | 1998        |
| <b>MF041963</b>      | CDV-06        | Wolf        | Ethiopia       | Europe/wildlife             | 2016        |
| <b>KP677502</b>      | Louguan thai  | Panda       | China          | Asia-1                      | 2015        |
| <b>KM280689</b>      | Uy251         | Dog         | Uruguay        | Europe/South America-1      | 2012        |
| <b>KY971532</b>      | WT02SA        | Hyena       | Africa         | South Africa                | 2017        |

<sup>a</sup> Genotype classification based on complete H gene of the CDV.

N/A: No available data



**Table S4.** Evidence for positive and negative selection using various detection methods

| CDV genome | Selection pressure analysis | SLAC  | FEL   | FUBAR |
|------------|-----------------------------|-------|-------|-------|
| H gene     | Positive selection          | 0     | 4     | 3     |
|            | Negative selection          | 47    | 125   | 134   |
|            | Overall dN/dS               | 0.240 | 0.228 | 0.177 |
| N gene     | Positive selection          | 0     | 0     | 0     |
|            | Negative selection          | 30    | 90    | 143   |
|            | Overall dN/dS               | 0.094 | 0.087 | 0.102 |
| F gene     | Positive selection          | 0     | 8     | 8     |
|            | Negative selection          | 26    | 95    | 100   |
|            | Overall dN/dS               | 0.296 | 0.280 | 0.203 |
| P gene     | Positive selection          | 0     | 2     | 10    |
|            | Negative selection          | 16    | 56    | 42    |
|            | Overall dN/dS               | 0.362 | 0.336 | 0.524 |
| M gene     | Positive selection          | 0     | 0     | 0     |
|            | Negative selection          | 13    | 55    | 73    |
|            | Overall dN/dS               | 0.047 | 0.039 | 0.051 |
| L gene     | Positive selection          | 0     | 1     | 1     |
|            | Negative selection          | 139   | 398   | 278   |
|            | Overall dN/dS               | 0.097 | 0.086 | 0.102 |

**Table S5. Viral titer of individual CDV's TH/2014 strain.**

| <b>CDV strain</b> | <b>Log 10 TCID<sub>50</sub> /ml</b> |
|-------------------|-------------------------------------|
| CDV1 TH/2014*     | 10 <sup>2.75</sup>                  |
| CDV2 TH/2014*     | 10 <sup>3.5</sup>                   |
| CDV3 TH/2014*     | 10 <sup>5</sup>                     |
| CDV4 TH/2014      | 10 <sup>2.167</sup>                 |
| CDV5 TH/2014*     | 10 <sup>2.875</sup>                 |
| CDV6 TH/2014      | 10 <sup>3</sup>                     |
| CDV7 TH/2014      | 10 <sup>2.5</sup>                   |
| CDV8 TH/2014*     | 10 <sup>2.625</sup>                 |

\* The strains were classified as CDV Asia-4.
